# Supplementary material for: Healthier Dietary Patterns Are Associated with Better Sleep Quality among Shanghai Suburban Adults: A Cross-Sectional Study
Source: MDPI journal article supplement (doi:10.3390/nu16081165), 2024-04-13
Supplement: s1 [file s1]

**Supplemental table S1. Components and scoring of the CHEI, DASH and MD**

| Component                              | Intake of<br>minimum score  | Intake of<br>maximum score | Score<br>range |
|----------------------------------------|-----------------------------|----------------------------|----------------|
| CHEI-2016                              |                             |                            | 0 ~ 100        |
| 1. Total Grains (sp)                   | 0                           | ≥ 2.5                      | 0 ~ 5          |
| 2. Whole Grains and Mixed Beans (sp)   | 0                           | ≥ 0.6                      | 0 ~ 5          |
| 3. Tubers (sp)                         | 0                           | ≥ 0.3                      | 0 ~ 5          |
| 4. Total Vegetables (sp)               | 0                           | ≥ 1.9                      | 0 ~ 5          |
| 5. Dark Vegetables (sp)                | 0                           | ≥ 0.9                      | 0 ~ 5          |
| 6. Fruits (sp)                         | 0                           | ≥ 1.1                      | 0 ~ 10         |
| 7. Dairy (sp)                          | 0                           | ≥ 0.5                      | 0 ~ 5          |
| 8. Soybeans (sp)                       | 0                           | ≥ 0.4                      | 0 ~ 5          |
| 9. Nuts (sp)                           | 0                           | ≥ 0.4                      | 0 ~ 5          |
| 10. Fish and Seafood (sp)              | 0                           | ≥ 0.6                      | 0 ~ 5          |
| 11. Poultry (sp)                       | 0                           | ≥ 0.3                      | 0 ~ 5          |
| 12. Eggs (sp)                          | 0                           | ≥ 0.5                      | 0 ~ 5          |
| 13. Red Meat (sp)                      | ≥ 3.5                       | ≤ 0.4                      | 0 ~ 5          |
| 14. Cooking Oils (g)                   | ≥ 32.6                      | ≤ 15.6                     | 0 ~ 10         |
| 15. Sodium (mg)                        | ≥ 3608                      | ≤ 1000                     | 0 ~ 10         |
| 16. Added Sugars (% of Energy Intake)  | ≥ 20%                       | ≤ 10%                      | 0 ~ 5          |
| 17. Alcohol (g)                        | ≥ 60 (male);<br>≥40(Female) | ≤ 25(male);<br>≤15(Female) | 0 ~ 5          |
| DASH <sup>a</sup>                      |                             |                            | 8 ~ 40         |
| 1. Fruits (sp)                         | Quintile 1                  | Quintile 5                 | 1 ~ 5          |
| 2. Vegetables (sp)                     | Quintile 1                  | Quintile 5                 | 1 ~ 5          |
| 3. Nuts and legumes (sp)               | Quintile 1                  | Quintile 5                 | 1 ~ 5          |
| 4. Low-fat dairy (sp)                  | Quintile 1                  | Quintile 5                 | 1 ~ 5          |
| 5. Whole grains (sp)                   | Quintile 1                  | Quintile 5                 | 1 ~ 5          |
| 6. Red and processed meats (sp)        | Quintile 5                  | Quintile 1                 | 1 ~ 5          |
| 7. Sugar-sweetened beverages (g)       | Quintile 5                  | Quintile 1                 | 1 ~ 5          |
| 8. Sodium (mg)                         | Quintile 5                  | Quintile 1                 | 1 ~ 5          |
| MD                                     |                             |                            | 0 ~ 9          |
| 1. Vegetables (sp)                     | Below the median            | Above the median           | 0 ~ 1          |
| 2. Fruits (sp)                         | Below the median            | Above the median           | 0 ~ 1          |
| 3. Nuts (sp)                           | Below the median            | Above the median           | 0 ~ 1          |
| 4. Whole grains (sp)                   | Below the median            | Above the median           | 0 ~ 1          |
| 5. Legumes (sp)                        | Below the median            | Above the median           | 0 ~ 1          |
| 6. Fish and Seafood (sp)               | Below the median            | Above the median           | 0 ~ 1          |
| 7. Monounsaturated/saturated fat ratio | Below the median            | Above the median           | 0 ~ 1          |
| 8. Red and processed meats (sp)        | Below the median            | Above the median           | 0 ~ 1          |
| 9. Alcohol (g)                         | <5, > 15                    | 5 ~ 15                     | 0 ~ 1          |

CHEI: Chinese Healthy Eating Index; DASH: Dietary Approaches to Stop Hypertension; MD: Mediterranean Diet; SP: Standard Portion; <sup>a</sup>: Intakes between the minimum and maximum levels are scored proportionately.

**Supplemental table S2. Food groups and items in Food frequency questionnaire**

| Food groups                  | Items in Food frequency questionnaire                                                                            |
|------------------------------|------------------------------------------------------------------------------------------------------------------|
| Grains and tubers            | Rice and rice products, wheat and wheat products, potato, cassava, yam, fried dough foods and potato chips, etc. |
| Whole Grains and Mixed Beans | Sorghum, millet, oats, mung beans and red beans, etc.                                                            |
| Soybeans and soy products    | Soybean, soy milk, tofu, etc.                                                                                    |
| Vegetables                   | Dark-green leafy vegetables, red and yellow vegetables, stem, melon, root, algae and mushroom, etc.              |
| Dairy and dairy products     | Fresh milk, yogurt, powdered milk and cheese, etc.                                                               |
| Fruits                       | Fresh and canned (no added sugar) fruits, etc.                                                                   |
| Nuts and Seeds               | Peanuts, walnuts, almonds and melon seeds, etc.                                                                  |
| Meats                        | Pork, beef and lamb, animal viscera and processed meat, etc.                                                     |
| Poultry                      | Chicken, duck and goose, etc.                                                                                    |
| Eggs                         | Whole eggs, yolk, white, preserved eggs, etc.                                                                    |
| Fish and seafood             | Freshwater fish, sea fish, shrimp, crab, shellfish, etc.                                                         |
| Alcohol                      | Chinese rice wine, beer, wine, white wine and whiskey, etc.                                                      |
| Sugar-sweetened beverages    | Carbonated drinks, flavored drinks, soft drinks, etc.                                                            |
| Juice                        | Pure fruit juice.                                                                                                |
| Snacks                       | Sugar, jam, honey, cakes, chocolate, mooncake, potato chips, ice cream, etc.                                     |
| Salted food                  | Preserved meat, preserved vegetables, sausages, etc.                                                             |
